# Supplementary material for: Genome-Wide Identification and Characterization of CDPK Family Reveal Their Involvements in Growth and Development and Abiotic Stress in Sweet Potato and Its Two Diploid Relatives
Source: MDPI journal article supplement (doi:10.3390/ijms23063088), 2022-03-13
Supplement: s1 [file s1]

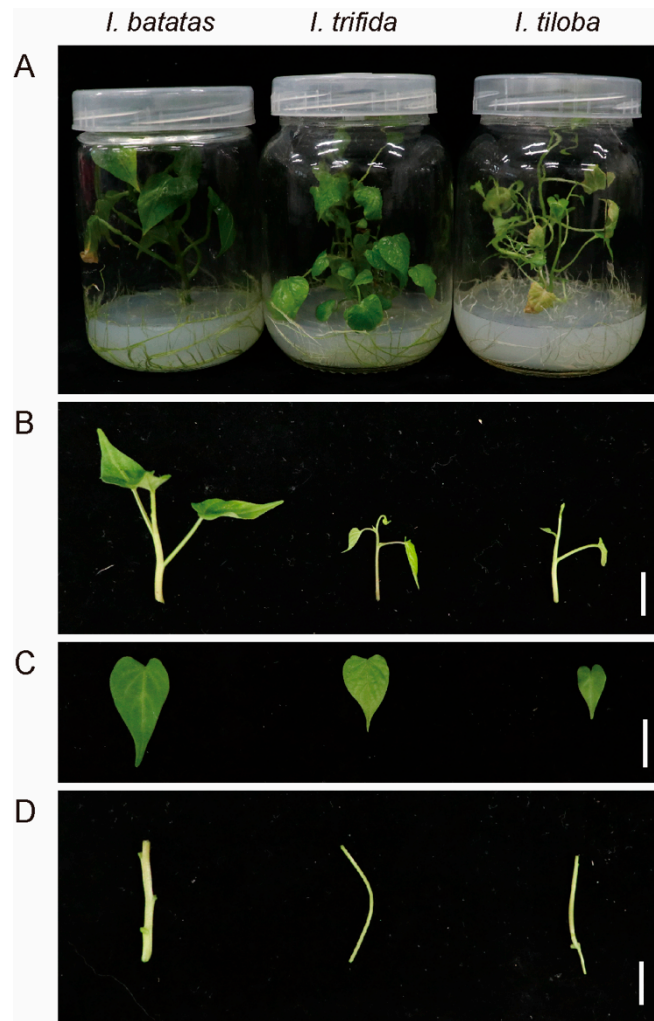

**Figure S1.** Morphology of *Ipomoea batatas*, *I. trifida*, and *I. triloba*. (A) *In vitro*-grown plants, (B) buds, (C) leaves and (D) stems of *I. batatas* "ND98", *I. trifida* NCNSP0306, and *I. triloba* NCNSP0323. Scale bars, 1cm.

**Table S1.** Identification of CDPK family genes in *I. batatas*, *I. trifida*, and *I. triloba*.

| <i>Arabidopsis</i>                                                                                                                                                                                           | Homologous gene in<br><i>I. batatas</i> / <i>I. trifida</i> / <i>I. triloba</i> | Gene ID        | Gene name          | Chromosome<br>localization |
|--------------------------------------------------------------------------------------------------------------------------------------------------------------------------------------------------------------|---------------------------------------------------------------------------------|----------------|--------------------|----------------------------|
| Group I :<br>AT5G04870/CDPK1<br>AT3G10660/CDPK2<br>AT4G09570/CDPK4<br>AT4G35310/CDPK5<br>AT2G17290/CDPK6<br>AT1G35670/CDPK11<br>AT5G23580/CDPK12<br>AT2G38910/CDPK20<br>AT2G35890/CDPK25<br>AT4G38230/CDPK26 | <i>I. batatas</i>                                                               | Ib01g3472      | <i>IbCDPK1</i>     | LG1:24830785-24835345      |
|                                                                                                                                                                                                              |                                                                                 | Ib07g25704     | <i>IbCDPK2</i>     | LG7:2699303-2705437        |
|                                                                                                                                                                                                              |                                                                                 | Ib10g41295     | <i>IbCDPK5.1</i>   | LG10:23284891-23292007     |
|                                                                                                                                                                                                              |                                                                                 | Ib14g59849     | <i>IbCDPK5.2</i>   | LG14:30745372-30750537     |
|                                                                                                                                                                                                              |                                                                                 | Ib01g3989      | <i>IbCDPK11.1</i>  | LG1:28751452-28754855      |
|                                                                                                                                                                                                              |                                                                                 | Ib02g8624      | <i>IbCDPK11.2</i>  | LG2:32588144-32592507      |
|                                                                                                                                                                                                              |                                                                                 | Ib02g6000      | <i>IbCDPK11.3</i>  | LG2:12279066-12283322      |
|                                                                                                                                                                                                              |                                                                                 | Ib07g27783     | <i>IbCDPK12.1</i>  | LG7:18696882-18700991      |
|                                                                                                                                                                                                              |                                                                                 | Ib05g20844     | <i>IbCDPK12.2</i>  | LG5:30407064-30411224      |
|                                                                                                                                                                                                              |                                                                                 | Ib09g35646     | <i>IbCDPK12.3</i>  | LG9:11473256-11478686      |
|                                                                                                                                                                                                              |                                                                                 | Ib14g58329     | <i>IbCDPK20.1</i>  | LG14:21473796-21478088     |
|                                                                                                                                                                                                              |                                                                                 | Ib06g25035     | <i>IbCDPK20.2</i>  | LG6:30232923-30236999      |
|                                                                                                                                                                                                              |                                                                                 | Ib06g25043     | <i>IbCDPK25.1</i>  | LG6:30276514-30279598      |
|                                                                                                                                                                                                              |                                                                                 | Ib11g45599     | <i>IbCDPK25.2</i>  | LG11:30664898-30669882     |
|                                                                                                                                                                                                              |                                                                                 | Ib14g58318     | <i>IbCDPK25.3</i>  | LG14:21402724-21405804     |
|                                                                                                                                                                                                              |                                                                                 | Ib14g58307     | <i>IbCDPK25.4</i>  | LG14:21337074-21340153     |
|                                                                                                                                                                                                              | <i>I. trifida</i>                                                               | Itf05g05320.t1 | <i>ItfCDPK1</i>    | Chr05:5000266-5004899      |
|                                                                                                                                                                                                              |                                                                                 | Itf03g16550.t1 | <i>ItfCDPK2</i>    | Chr03:13311929-13316225    |
|                                                                                                                                                                                                              |                                                                                 | Itf08g15310.t1 | <i>ItfCDPK5.1</i>  | Chr08:14928027-14934826    |
|                                                                                                                                                                                                              |                                                                                 | Itf09g00070.t1 | <i>ItfCDPK5.2</i>  | Chr09:37207-42492          |
|                                                                                                                                                                                                              |                                                                                 | Itf05g01790.t1 | <i>ItfCDPK11.1</i> | Chr05:1418963-1422348      |
|                                                                                                                                                                                                              |                                                                                 | Itf04g21130.t1 | <i>ItfCDPK11.2</i> | Chr04:22531420-22535675    |
|                                                                                                                                                                                                              |                                                                                 | Itf03g27590.t1 | <i>ItfCDPK12.1</i> | Chr03:23958615-23962697    |
|                                                                                                                                                                                                              |                                                                                 | Itf12g27210.t1 | <i>ItfCDPK12.2</i> | Chr12:23765779-23769672    |
|                                                                                                                                                                                                              |                                                                                 | Itf10g12490.t1 | <i>ItfCDPK12.3</i> | Chr10:15034446-15039526    |
|                                                                                                                                                                                                              |                                                                                 | Itf09g12710.t1 | <i>ItfCDPK20.1</i> | Chr09:7567316-7571332      |
|                                                                                                                                                                                                              |                                                                                 | Itf15g02240.t1 | <i>ItfCDPK20.2</i> | Chr15:1278659-1281946      |
|                                                                                                                                                                                                              |                                                                                 | Itf15g02150.t1 | <i>ItfCDPK25.1</i> | Chr15:1230203-1233049      |
|                                                                                                                                                                                                              |                                                                                 | Itf01g08260.t1 | <i>ItfCDPK25.2</i> | Chr01:6871006-6875288      |
|                                                                                                                                                                                                              |                                                                                 | Itf09g12810.t1 | <i>ItfCDPK25.3</i> | Chr09:7632433-7635670      |
|                                                                                                                                                                                                              | <i>I. triloba</i>                                                               | Itb05g04690.t1 | <i>ItbCDPK1</i>    | Chr05:4310327-4314941      |
|                                                                                                                                                                                                              |                                                                                 | Itb03g17340.t1 | <i>ItbCDPK2</i>    | Chr03:15981183-15985409    |
|                                                                                                                                                                                                              |                                                                                 | Itb08g16550.t1 | <i>ItbCDPK5.1</i>  | Chr08:18612128-18618594    |
|                                                                                                                                                                                                              |                                                                                 | Itb09g00070.t1 | <i>ItbCDPK5.2</i>  | Chr09:170227-175626        |
|                                                                                                                                                                                                              |                                                                                 | Itb05g01310.t1 | <i>ItbCDPK11.1</i> | Chr05:1115236-1118389      |
|                                                                                                                                                                                                              |                                                                                 | Itb04g20500.t1 | <i>ItbCDPK11.2</i> | Chr04:25266912-25271378    |
|                                                                                                                                                                                                              |                                                                                 | Itb03g26380.t2 | <i>ItbCDPK12.1</i> | Chr03:25926382-25930586    |
|                                                                                                                                                                                                              |                                                                                 | Itb12g27640.t1 | <i>ItbCDPK12.2</i> | Chr12:27917080-27921089    |
|                                                                                                                                                                                                              |                                                                                 | Itb10g13020.t1 | <i>ItbCDPK12.3</i> | Chr10:19104450-19110550    |

|                                                                                                                                                                                                                                                                             |                   |                |                    |                         |
|-----------------------------------------------------------------------------------------------------------------------------------------------------------------------------------------------------------------------------------------------------------------------------|-------------------|----------------|--------------------|-------------------------|
|                                                                                                                                                                                                                                                                             |                   | Itb09g13740.t1 | <i>ItbCDPK20.1</i> | Chr09:8992317-8995794   |
|                                                                                                                                                                                                                                                                             |                   | Itb15g02380.t1 | <i>ItbCDPK20.2</i> | Chr15:1441612-1451578   |
|                                                                                                                                                                                                                                                                             |                   | Itb15g02300.t1 | <i>ItbCDPK25.1</i> | Chr15:1394597-1397355   |
|                                                                                                                                                                                                                                                                             |                   | Itb01g12560.t1 | <i>ItbCDPK25.2</i> | Chr01:12112283-12117224 |
|                                                                                                                                                                                                                                                                             |                   | Itb09g13830.t1 | <i>ItbCDPK25.3</i> | Chr09:9067762-9071145   |
| Group II:<br>AT4G23650/CDPK3<br>AT3G20410/CDPK9<br>AT4G21940/CDPK15<br>AT5G12180/CDPK17<br>AT1G61950/CDPK19<br>AT4G04720/CDPK21<br>AT4G04710/CDPK22<br>AT4G04740/CDPK23<br>AT4G04700/CDPK27<br>AT1G76040/CDPK29<br>AT4G04695/CDPK31<br>AT1G50700/CDPK33<br>AT5G19360/CDPK34 | <i>I. batatas</i> | Ib05g19617     | <i>IbCDPK3</i>     | LG5:22129803-22135374   |
|                                                                                                                                                                                                                                                                             |                   | Ib09g34428     | <i>IbCDPK9</i>     | LG9:2567297-2572974     |
|                                                                                                                                                                                                                                                                             |                   | Ib02g4428      | <i>IbCDPK17.1</i>  | LG2:1691652-1694865     |
|                                                                                                                                                                                                                                                                             |                   | Ib12g50948     | <i>IbCDPK17.2</i>  | LG12:30175165-30179535  |
|                                                                                                                                                                                                                                                                             |                   | Ib10g38551     | <i>IbCDPK29.1</i>  | LG10:2597602-2602106    |
|                                                                                                                                                                                                                                                                             |                   | Ib15g60594     | <i>IbCDPK29.2</i>  | LG15:4439385-4443335    |
|                                                                                                                                                                                                                                                                             |                   | Ib15g60591     | <i>IbCDPK29.3</i>  | LG15:4418925-4422944    |
|                                                                                                                                                                                                                                                                             |                   | Ib01g217       | <i>IbCDPK33.1</i>  | LG1:1168963-1172868     |
|                                                                                                                                                                                                                                                                             |                   | Ib15g61179     | <i>IbCDPK33.2</i>  | LG15:8410101-8413448    |
|                                                                                                                                                                                                                                                                             |                   | Ib03g11293     | <i>IbCDPK34.1</i>  | LG3:13809400-13813225   |
|                                                                                                                                                                                                                                                                             |                   | Ib03g11291     | <i>IbCDPK34.2</i>  | LG3:13789742-13795902   |
|                                                                                                                                                                                                                                                                             | <i>I. trifida</i> | Itf12g18690.t1 | <i>ItfCDPK3</i>    | Chr12:18034787-18043398 |
|                                                                                                                                                                                                                                                                             |                   | Itf10g21110.t1 | <i>ItfCDPK9</i>    | Chr10:22415094-22420328 |
|                                                                                                                                                                                                                                                                             |                   | Itf04g33180.t1 | <i>ItfCDPK17.1</i> | Chr04:31547514-31550480 |
|                                                                                                                                                                                                                                                                             |                   | Itf07g01450.t1 | <i>ItfCDPK17.2</i> | Chr07:796713-801278     |
|                                                                                                                                                                                                                                                                             |                   | Itf08g02950.t1 | <i>ItfCDPK29.1</i> | Chr08:2047133-2051513   |
|                                                                                                                                                                                                                                                                             |                   | Itf06g21180.t1 | <i>ItfCDPK29.2</i> | Chr06:22697131-22701278 |
|                                                                                                                                                                                                                                                                             |                   | Itf05g25980.t1 | <i>ItfCDPK33.1</i> | Chr05:24927675-24930598 |
|                                                                                                                                                                                                                                                                             |                   | Itf06g16440.t1 | <i>ItfCDPK33.2</i> | Chr06:19418232-19421675 |
|                                                                                                                                                                                                                                                                             |                   | Itf14g09720.t2 | <i>ItfCDPK34</i>   | Chr14:8435021-8438271   |
|                                                                                                                                                                                                                                                                             | <i>I. triloba</i> | Itb12g18970.t2 | <i>ItbCDPK3</i>    | Chr12:21278101-21282504 |
|                                                                                                                                                                                                                                                                             |                   | Itb10g21210.t1 | <i>ItbCDPK9</i>    | Chr10:26513343-26518575 |
|                                                                                                                                                                                                                                                                             |                   | Itb04g32820.t1 | <i>ItbCDPK17.1</i> | Chr04:35228752-35233296 |
|                                                                                                                                                                                                                                                                             |                   | Itb07g01520.t1 | <i>ItbCDPK17.2</i> | Chr07:919387-924182     |
|                                                                                                                                                                                                                                                                             |                   | Itb08g03030.t1 | <i>ItbCDPK29.1</i> | Chr08:2552604-2557130   |
|                                                                                                                                                                                                                                                                             |                   | Itb06g19660.t1 | <i>ItbCDPK29.2</i> | Chr06:22888417-22892731 |
|                                                                                                                                                                                                                                                                             |                   | Itb05g26680.t1 | <i>ItbCDPK33.1</i> | Chr05:30423254-30427294 |
|                                                                                                                                                                                                                                                                             |                   | Itb06g14790.t1 | <i>ItbCDPK33.2</i> | Chr06:19254127-19257539 |
|                                                                                                                                                                                                                                                                             |                   | Itb14g13930.t1 | <i>ItbCDPK34</i>   | Chr14:16308224-16312921 |
|                                                                                                                                                                                                                                                                             | <i>I. batatas</i> | Ib12g50922     | <i>IbCDPK7</i>     | LG12:30012193-30017201  |
|                                                                                                                                                                                                                                                                             |                   | Ib03g11409     | <i>IbCDPK8</i>     | LG3:14627004-14632258   |
|                                                                                                                                                                                                                                                                             |                   | Ib13g53626     | <i>IbCDPK10</i>    | LG13:18270694-18279128  |
|                                                                                                                                                                                                                                                                             |                   | Ib14g58861     | <i>IbCDPK13</i>    | LG14:25089809-25095153  |
|                                                                                                                                                                                                                                                                             |                   | Ib14g58509     | <i>IbCDPK14</i>    | LG14:22811668-22815893  |
|                                                                                                                                                                                                                                                                             |                   | Ib09g36010     | <i>IbCDPK24</i>    | LG9:14310550-14314074   |
|                                                                                                                                                                                                                                                                             |                   | Ib08g33870     | <i>IbCDPK30</i>    | LG8:26191741-26195526   |
|                                                                                                                                                                                                                                                                             |                   | Ib06g24869     | <i>IbCDPK32</i>    | LG6:29208378-29212137   |
|                                                                                                                                                                                                                                                                             | <i>I. trifida</i> | Itf07g01710.t1 | <i>ItfCDPK7</i>    | Chr07:954406-959418     |
|                                                                                                                                                                                                                                                                             |                   | Itf14g09010.t3 | <i>ItfCDPK8</i>    | Chr14:7627304-7632439   |

|                                                                       |                   |                |                  |                         |
|-----------------------------------------------------------------------|-------------------|----------------|------------------|-------------------------|
| Group IV:<br>AT2G17890/CDPK16<br>AT4G36070/CDPK18<br>AT5G66210/CDPK28 |                   | Itf02g04140.t1 | <i>ItfCDPK10</i> | Chr02:5200050-5205219   |
|                                                                       |                   | Itf09g09360.t1 | <i>ItfCDPK13</i> | Chr09:5200617-5205831   |
|                                                                       |                   | Itf09g11960.t1 | <i>ItfCDPK14</i> | Chr09:6957376-6961133   |
|                                                                       |                   | Itf10g25830.t1 | <i>ItfCDPK24</i> | Chr10:24769040-24772676 |
|                                                                       |                   | Itf11g21340.t1 | <i>ItfCDPK30</i> | Chr11:18573725-18577623 |
|                                                                       |                   | Itf15g03330.t1 | <i>ItfCDPK32</i> | Chr15:1971367-1975425   |
|                                                                       | <i>I. triloba</i> | Itb07g01790.t1 | <i>ItbCDPK7</i>  | Chr07:1087642-1092508   |
|                                                                       |                   | Itb14g13060.t1 | <i>ItbCDPK8</i>  | Chr14:14981121-14986426 |
|                                                                       |                   | Itb02g12420.t1 | <i>ItbCDPK10</i> | Chr02:8485298-8490453   |
|                                                                       |                   | Itb09g10160.t1 | <i>ItbCDPK13</i> | Chr09:6317662-6323291   |
|                                                                       |                   | Itb09g13020.t1 | <i>ItbCDPK14</i> | Chr09:8333129-8337006   |
|                                                                       |                   | Itb10g11150.t1 | <i>ItbCDPK24</i> | Chr10:16611886-16615966 |
|                                                                       |                   | Itb11g23150.t1 | <i>ItbCDPK30</i> | Chr11:25070971-25074860 |
|                                                                       |                   | Itb15g03590.t1 | <i>ItbCDPK32</i> | Chr15:2273843-2278005   |
|                                                                       | <i>I. batatas</i> | Ib07g29399     | <i>IbCDPK16</i>  | LG7:30194492-30205186   |
|                                                                       |                   | Ib01g414       | <i>IbCDPK18</i>  | LG1:2258185-2262845     |
|                                                                       |                   | Ib05g16972     | <i>IbCDPK28</i>  | LG5:2210945-2216258     |
|                                                                       | <i>I. trifida</i> | Itf03g06870.t1 | <i>ItfCDPK16</i> | Chr03:4401137-4406030   |
|                                                                       |                   | Itf05g23880.t1 | <i>ItfCDPK18</i> | Chr05:23880059-23885122 |
|                                                                       |                   | Itf12g02710.t1 | <i>ItfCDPK28</i> | Chr12:1632109-1638134   |
|                                                                       | <i>I. triloba</i> | Itb03g06930.t1 | <i>ItbCDPK16</i> | Chr03:5010301-5015125   |
|                                                                       |                   | Itb05g24590.t1 | <i>ItbCDPK18</i> | Chr05:29316001-29321092 |
|                                                                       |                   | Itb12g02840.t1 | <i>ItbCDPK28</i> | Chr12:1862753-1869785   |
| Group V                                                               | <i>I. batatas</i> | Ib05g19617     | <i>IbCDPK3</i>   | LG5:22129803-22135374   |
|                                                                       | <i>I. trifida</i> | Itf15g08760.t1 | <i>ItfCDPK35</i> | Chr15:5743579-5746107   |
|                                                                       | <i>I. triloba</i> | Itb15g09200.t1 | <i>ItbCDPK35</i> | Chr15:6566782-6569097   |

**Table S2.** Primers used in this study.

| Gene              | Forward Primer              | Reverse Primer               |
|-------------------|-----------------------------|------------------------------|
| <i>IbCDPK1</i>    | GCCTATGGCGTTCAAAGTA         | TCATCCGTCTCCGTTTTGG          |
| <i>IbCDPK2</i>    | CCAAAATAAGCCGCCTGAG         | AACACCGAATCAGTCCTAAGTCC      |
| <i>IbCDPK3</i>    | TCTGTTGGGCAGCAGGTTT         | CCCAACTCGGTGTTCTCCTC         |
| <i>IbCDPK5.1</i>  | TCATTCCATCTCCAAGCGTAA       | TGTTCTGGGAAGAGGTCAAGC        |
| <i>IbCDPK5.2</i>  | TTCCATTTCCTCAACTGTAACCCT    | GGTTGGGCTGGGTATCCTT          |
| <i>IbCDPK7</i>    | TCTTCTGGGAACAGGGCTAAG       | GGTTGGGCTTCTTCTTGTC          |
| <i>IbCDPK8</i>    | GGGCCAAGAATGAGAATAGAAA      | GCTGTGAATGCTATCCCCTGTA       |
| <i>IbCDPK9</i>    | TAGGCAGGGAAGAGGAGTGG        | GAGGATGGGGCTGTGGATTA         |
| <i>IbCDPK10</i>   | GCAAAAGCCGATTACAAGCC        | GATTCCGGGCTTTGGGGAT          |
| <i>IbCDPK11.1</i> | ATGACAGGAGGGAAAGCAAAG       | GTCCCTCAGCCTTGGTGTTT         |
| <i>IbCDPK11.2</i> | CGCTTACCACTACGCCAAAA        | CAGCACCTGACTCTGGAAA          |
| <i>IbCDPK11.3</i> | AGACCTTTGGGTTTCAGCAGTT      | GATTTCTTCTTTTCAGACCTCCC      |
| <i>IbCDPK12.1</i> | GGGTGTCGGAAGAAGAACCA        | TCCTCCCCATGCTTCTCATC         |
| <i>IbCDPK12.2</i> | AAGGCAATGGAGGCGGAG          | CATTATTGTCTACAAGTCCTAGCGC    |
| <i>IbCDPK12.3</i> | ACTTTCACCGACTTCCTTTG        | CGTGAAAGAACCGCAGAGTC         |
| <i>IbCDPK13</i>   | TAGGGAGGATGTGAAGTCGGG       | TCCTTCTTCACCTCAGTCAGCA       |
| <i>IbCDPK14</i>   | GCAAAATGCTCAGACGGCT         | AGAGCTCTTTTCTTCAGCTTGTTT     |
| <i>IbCDPK16</i>   | ACCGCAAGACGACCACGAA         | CCTGGCTTTGTTGGACGCT          |
| <i>IbCDPK17.1</i> | AAGGAGGACGGAGAAGCACC        | CAACCTGCGATGACCCTGAG         |
| <i>IbCDPK17.2</i> | CAATCGGACCAAAATCAGGA        | CCCTAGCACCGTCCCTATCT         |
| <i>IbCDPK18</i>   | TGAGACCACTGCCACATCAAC       | CCCACAAGGGATAACCACAGT        |
| <i>IbCDPK20.1</i> | TTTCTGCGGCGGTTTGG           | GCCACTTCTTGATATGCGACT        |
| <i>IbCDPK20.2</i> | GACGGAGATTCCAATAATGAGC      | TATGTTCCCTGTCTTCCTCCC        |
| <i>IbCDPK24</i>   | GCAATGTGACTCGGGAGATG        | TTGTCCGTCCGTACCGATC          |
| <i>IbCDPK25.1</i> | CCTGTTTTGGTGGTTTCGG         | GGGGCTTATTGGTCTGAAGTG        |
| <i>IbCDPK25.2</i> | AGAGGTGGTGAGGATGGAGG        | CATCCCGTTTTGTGGTCTCA         |
| <i>IbCDPK25.3</i> | CTCAGAGGCTAAAGAGGCAGAA      | TTTCCTTGTCATTTCTCCTGT        |
| <i>IbCDPK25.4</i> | ATGGGATCTTTCATAAACTCTTTTG   | GTCTTCAAATTCCTCGGTTT         |
| <i>IbCDPK28</i>   | TGTTGCCCCAGAGGTATTGA        | GCCGACCACAGAGCAAAATA         |
| <i>IbCDPK29.1</i> | CTCAAGGAAGATGGCAATGC        | GACCTTCAGAGCAAGCTGCTT        |
| <i>IbCDPK29.2</i> | TGGGAAAGCCGTATGTGGA         | GCAGCATCAAAACCTCCCTC         |
| <i>IbCDPK29.3</i> | TCGCCCAGTCCCCATTGTA         | CCACATACGGCTTCCCAAGA         |
| <i>IbCDPK30</i>   | GAATCCGCCGCCAAGAA           | TCGGGTTTTGGGGATGA            |
| <i>IbCDPK32</i>   | CAAGCCAAACCCGTTCTCC         | GTGGGGTTTTCCAGCACATA         |
| <i>IbCDPK33.1</i> | GGAAGCCATCAGACTCACATTG      | GATTTTGGGATTGATTGTGGC        |
| <i>IbCDPK33.2</i> | ATGGGTATCATGGTGGAAATGG      | CTGGTTTTGGGCTTGGTTTAG        |
| <i>IbCDPK34.1</i> | CAAGGAGGATGGAGAAGCACC       | GCACCCTGCTATCACCTGA          |
| <i>IbCDPK34.2</i> | ATGGGTCATCCGCAGCAA          | TGCCCTATCTTCCCACCTGA         |
| <i>IbCDPK35</i>   | TAGCGAAACAGGATGAGATGGA      | CAAGGAGAAGCTGCTGCTGAG        |
| <i>Ibactin</i>    | AGCAGCATGAAGATTAAGTTGTAGCAC | TGGAAAATTAGAAGCACTTCCTGTGAAC |

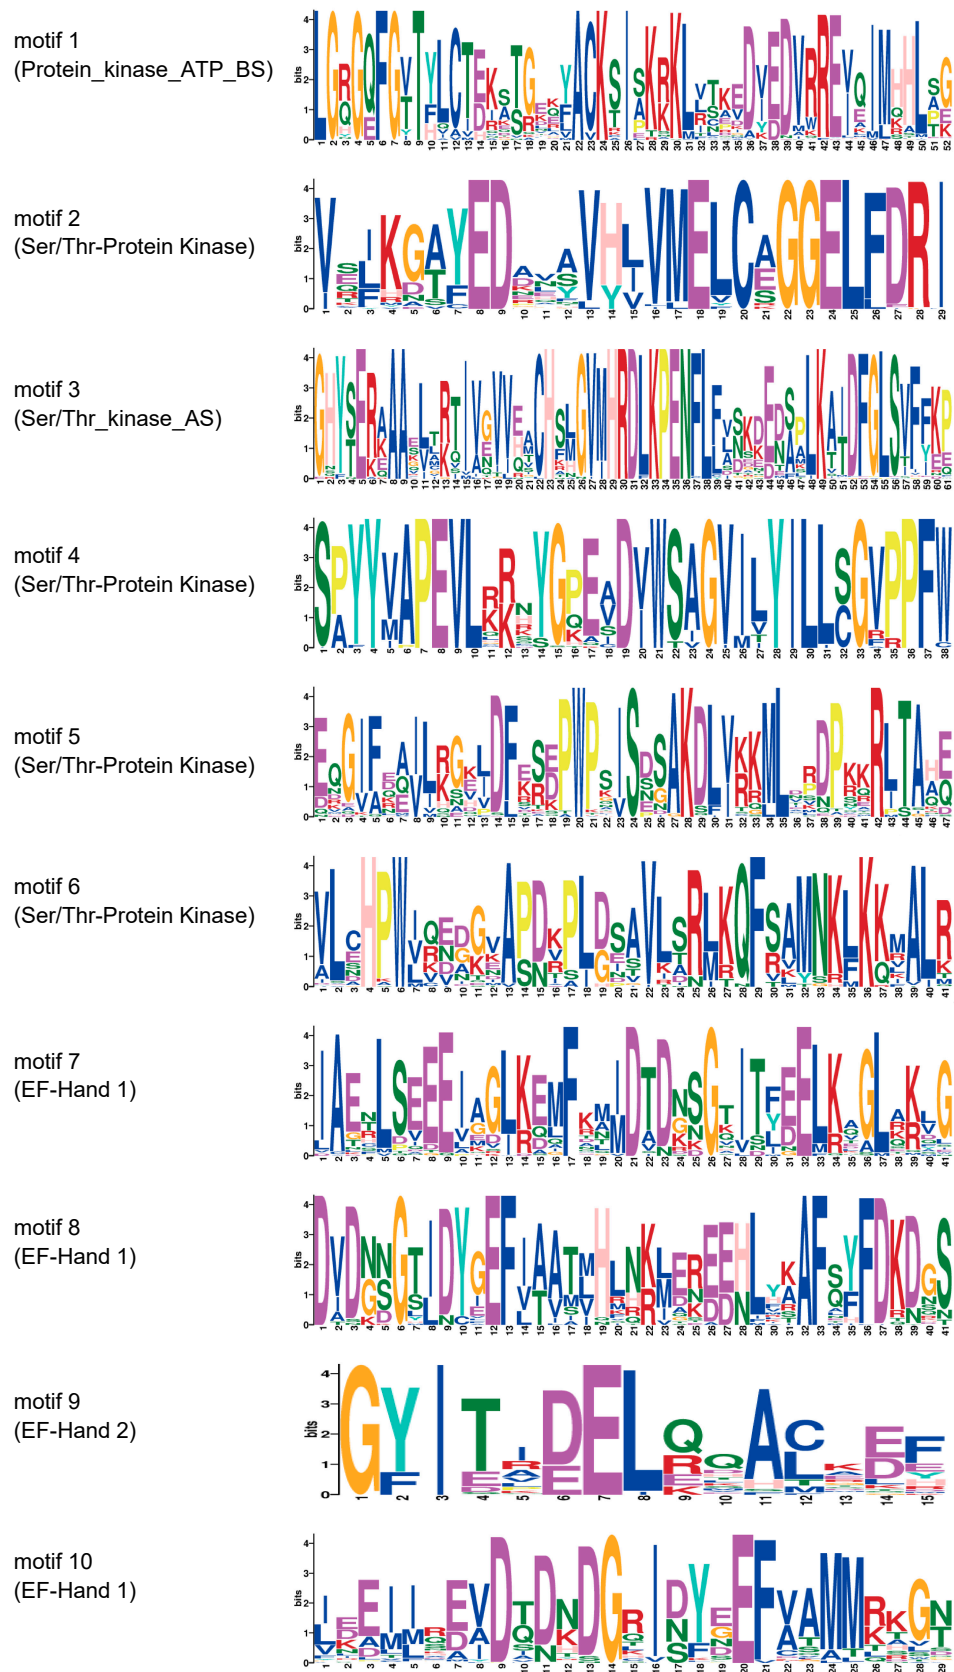

**Figure S2.** Conserved motifs analysis of IbCDPKs in *I. batatas*.
